# Supplementary material for: Sudden changes in nitrogen dioxide emissions over Greece due to lockdown after the outbreak of COVID-19
Source: Copernicus journal article supplement (doi:10.5194/acp-21-1759-2021), 2021-02-09
Supplement: Supplementary file 1 [file acp-21-1759-2021-supplement.pdf]

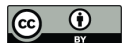

*Supplement of*

## **Sudden changes in nitrogen dioxide emissions over Greece due to lockdown after the outbreak of COVID-19**

**Maria-Elissavet Koukouli et al.**

*Correspondence to:* Maria-Elissavet Koukouli (mariliza@auth.gr)

The copyright of individual parts of the supplement might differ from the CC BY 4.0 License.

Table S1. Geographical distribution and population of the six main cities discussed in this work [HAS, 2011].

| City         | Region of         | Latitude | Longitude | Population |
|--------------|-------------------|----------|-----------|------------|
| Athens       | Attica            | 37.98° N | 23.72° E  | 3.218.218  |
| Thessaloniki | Central Macedonia | 40.64° N | 22.94° E  | 789.191    |
| Larisa       | Thessaly          | 39.63° N | 22.41° E  | 144.651    |
| Volos        | Thessaly          | 39.36° N | 22.95° E  | 118.707    |
| Patra        | Western Greece    | 38.24° N | 21.73° E  | 168.202    |
| Heraklio     | Crete             | 35.33° N | 25.14° E  | 153.653    |

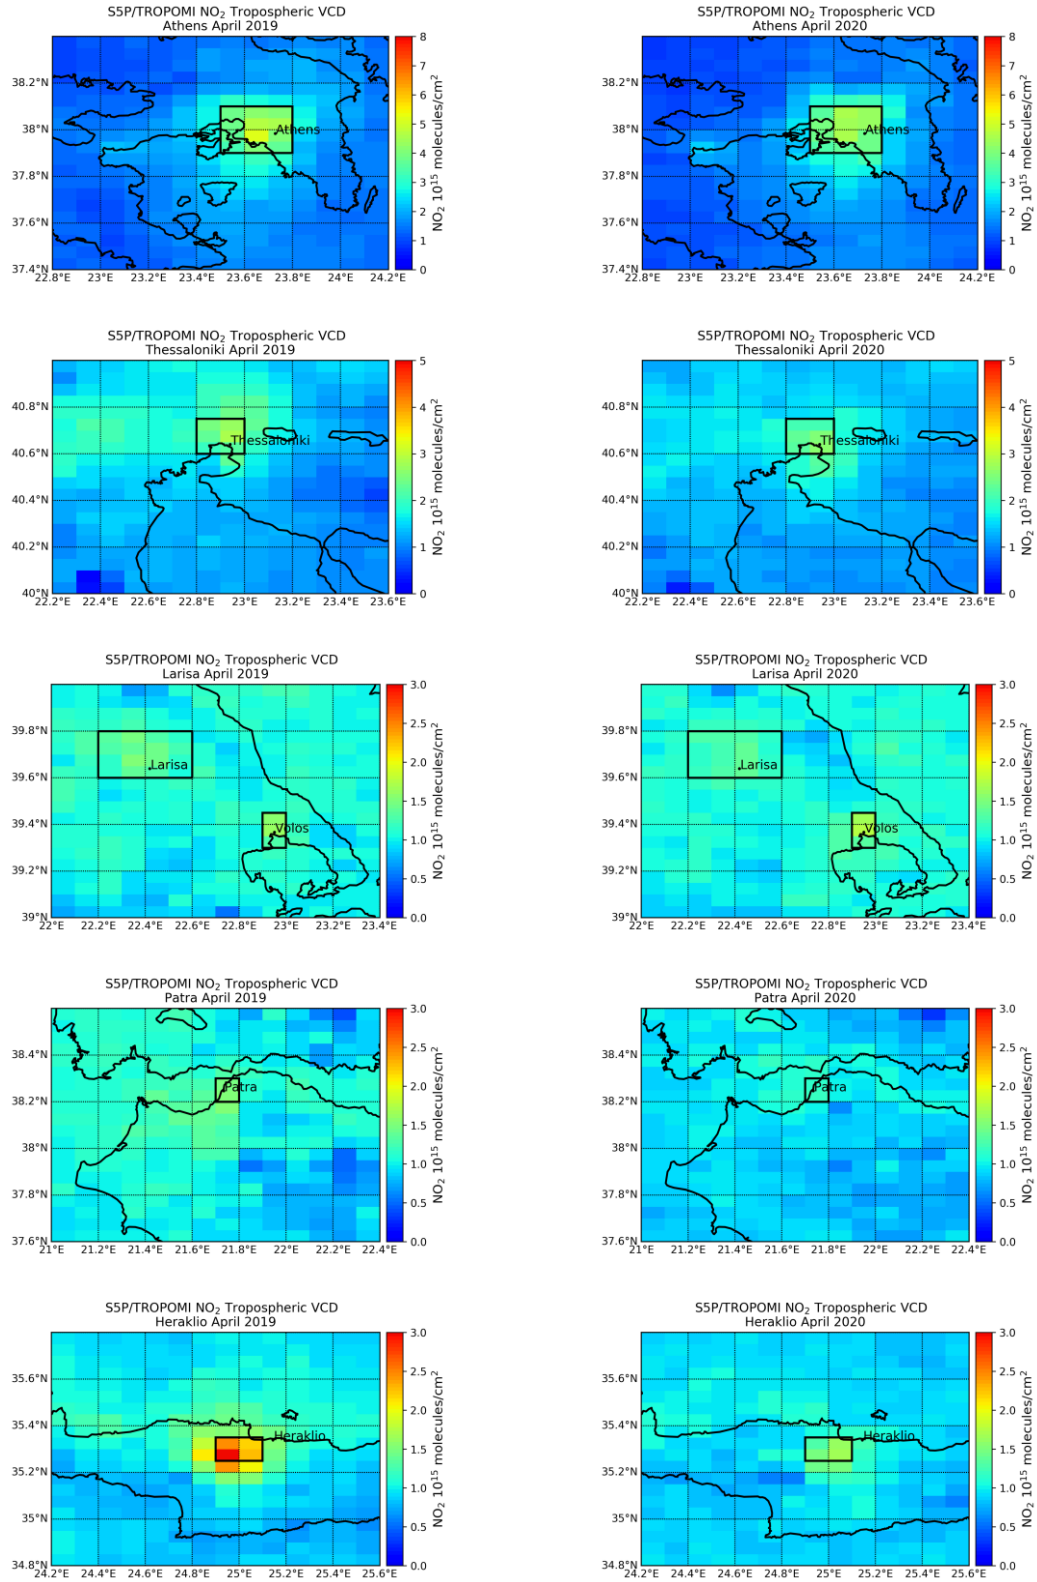

Figure S1. Monthly mean TROPOMI tropospheric NO<sub>2</sub> columns, in 10<sup>15</sup> molecules/cm<sup>2</sup>, for April 2019 [left] and April 2020 [right] for the five major cities in Greece. First row, Athens; second, Thessaloniki; third, Larisa and Volos; fourth, Patras and fifth, Heraklio. The boxes mark the pixels used in the numerical analysis.

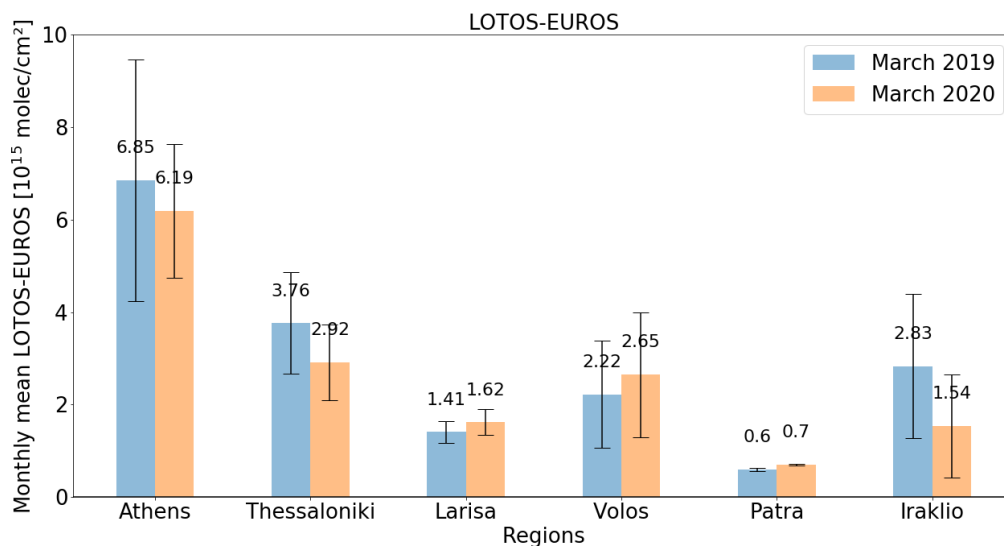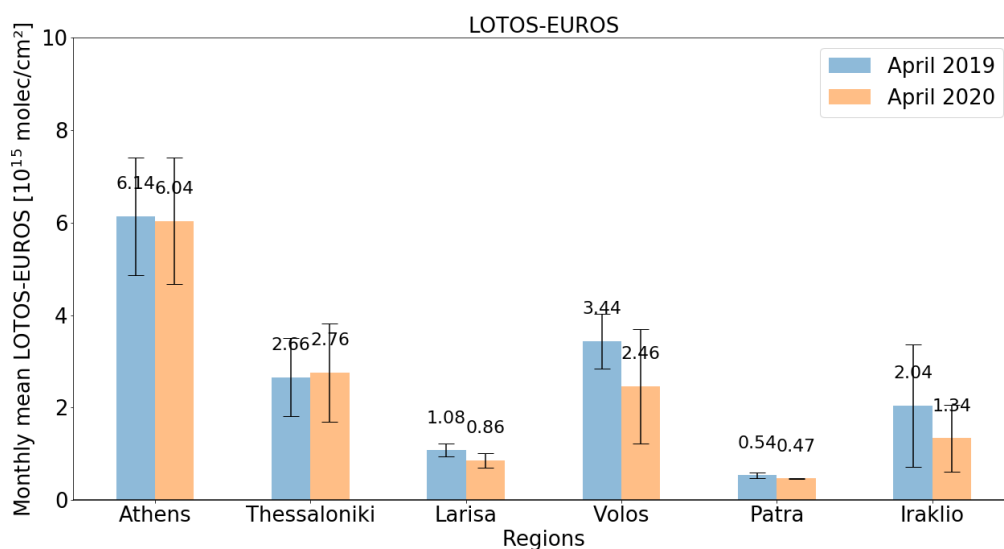

Figure S2. Monthly mean LOTOS-EUROS simulated NO<sub>2</sub> columns, in 10<sup>15</sup> molecules/cm<sup>2</sup>, for March [upper] and April [lower] for the 2019 [blue] and 2020 [orange] for the five major cities in Greece, from left to right, Athens, Thessaloniki, Larisa, Volos, Patra and Heraklio

Table S2. Monthly mean LOTOS-EUROS NO<sub>2</sub> levels [10<sup>15</sup> molecules/cm<sup>2</sup>] over major cities in Greece for March [left block] and April [right block] for year 2019 and 2020 and their relative difference, standard deviation and number of pixels [in brackets].

| Location         | 03.2019   | 03.2020   | % diff | 04.2019   | 04. 2020  | % diff |
|------------------|-----------|-----------|--------|-----------|-----------|--------|
| Athens [12]      | 6.85±2.61 | 6.19±1.44 | -10%   | 6.14±1.27 | 6.04±1.37 | -2%    |
| Thessaloniki [6] | 3.76±1.09 | 2.92±0.82 | -22%   | 2.66±0.85 | 2.76±1.06 | 4%     |
| Larisa [6]       | 1.41±0.23 | 1.62±0.28 | 15%    | 1.08±0.14 | 0.86±0.16 | -20%   |
| Volos [3]        | 2.22±1.16 | 2.65±1.35 | 19%    | 3.44±0.59 | 2.46±1.24 | -28%   |
| Patra [2]        | 0.6±0.04  | 0.7±0.02  | 17%    | 0.54±0.06 | 0.47±0.01 | -13%   |
| Heraklio [4]     | 2.83±1.56 | 1.54±1.11 | -46%   | 2.04±1.32 | 1.34±0.72 | -34%   |

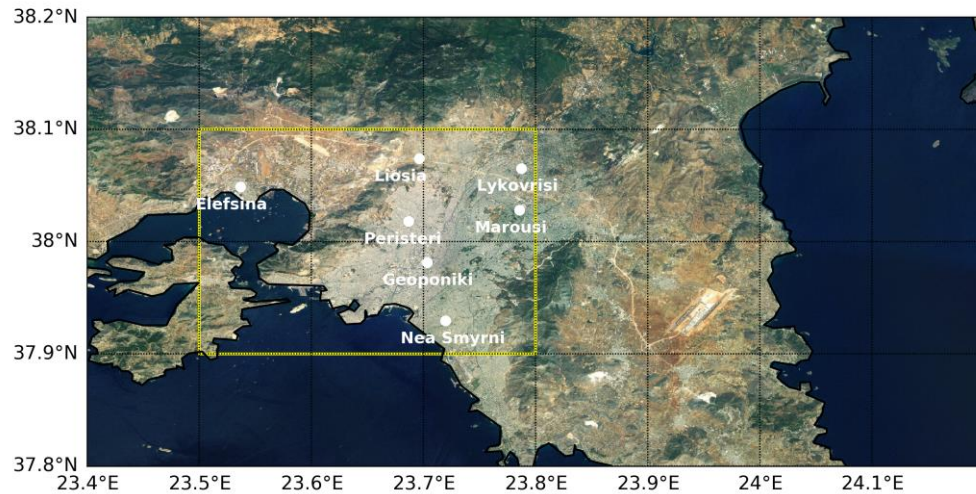

Figure S3. The location of the in situ air quality stations discussed in this work around the prefecture of Athens. [Created using background from the ArcGIS service].

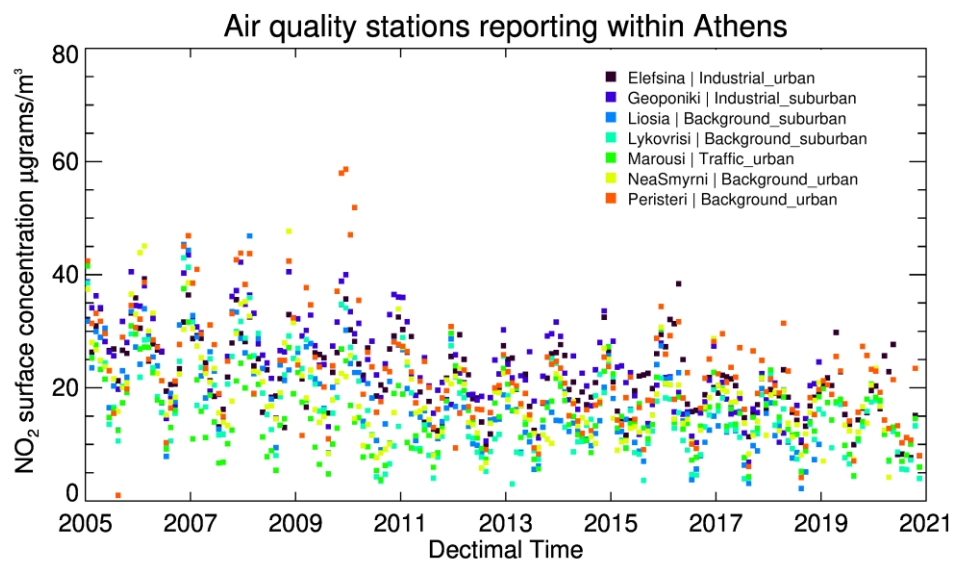

Figure S4. The long term monthly time series of the in situ measurements of NO<sub>2</sub> surface concentrations at 12:00 UTC in µgrams/m<sup>3</sup> for the seven stations discussed in this work, labeled in the legend alongside their official station type classification.

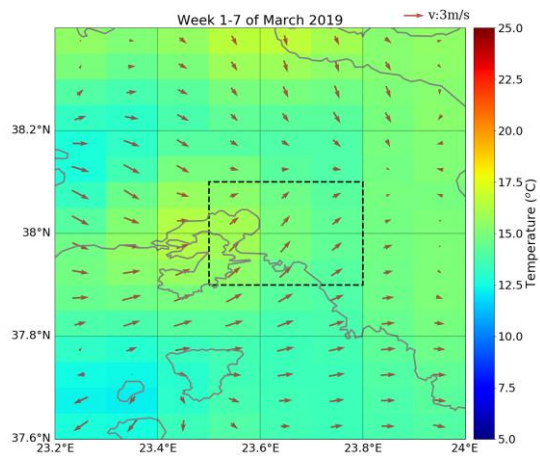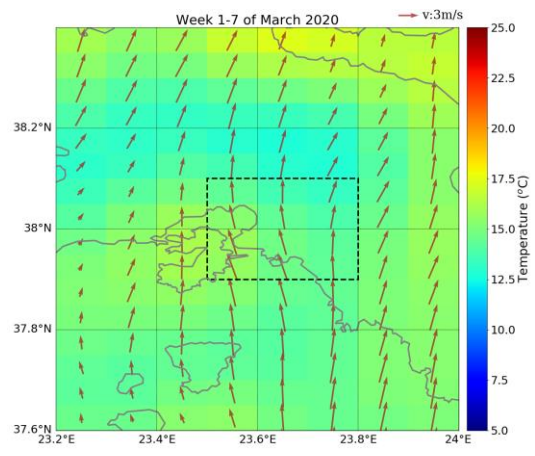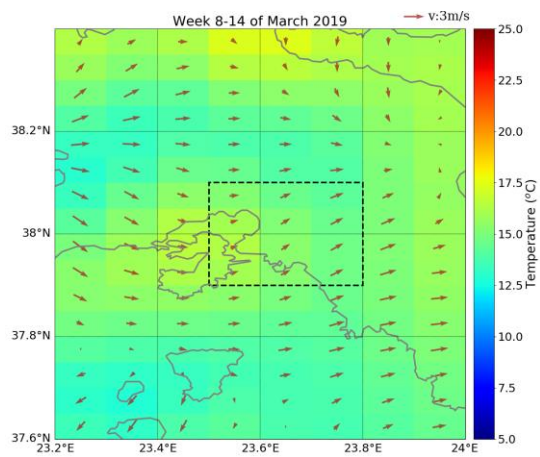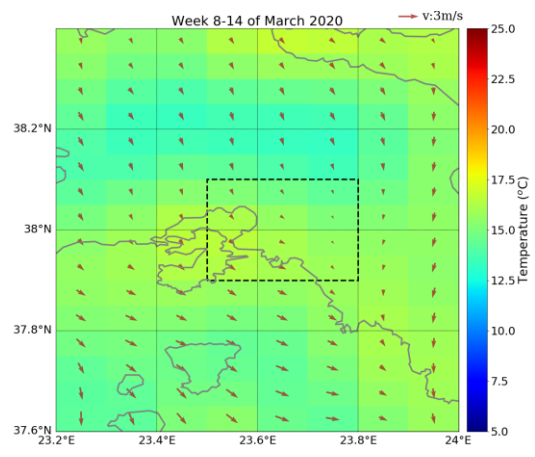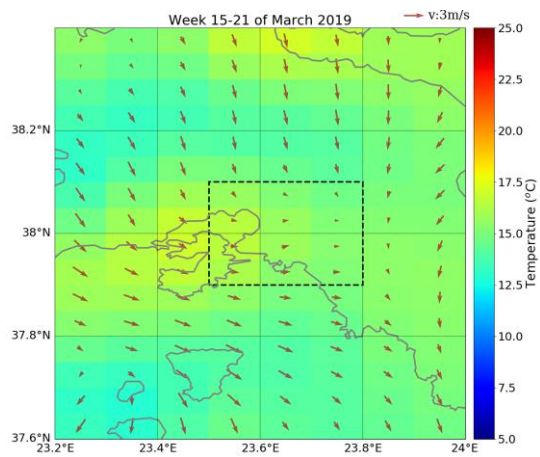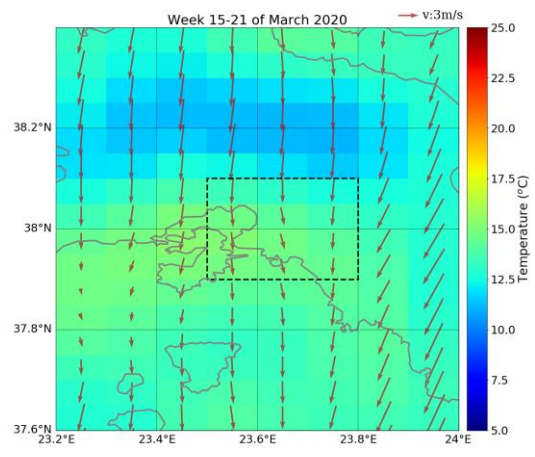



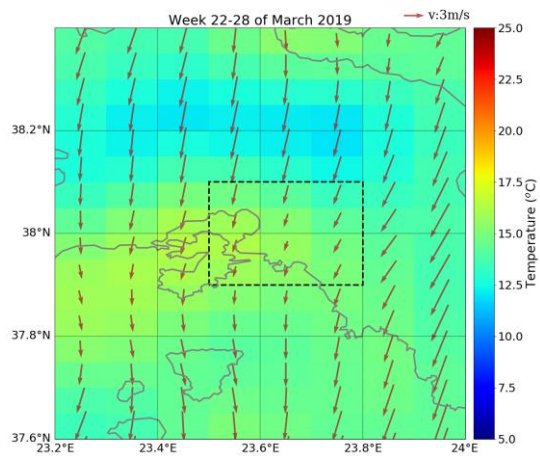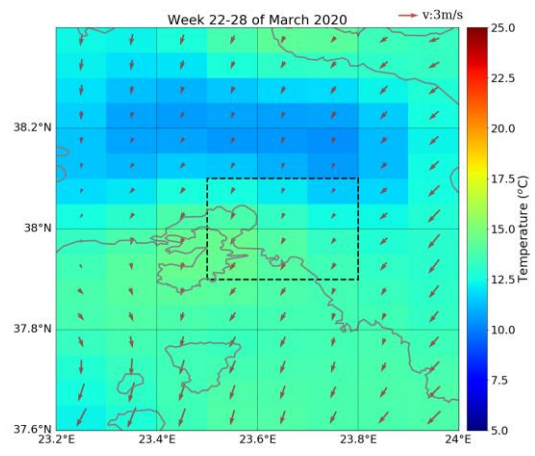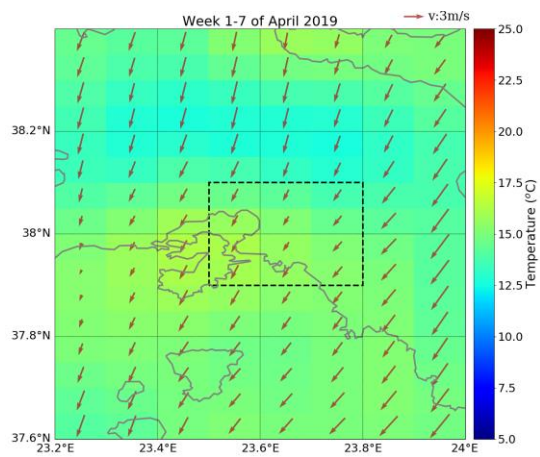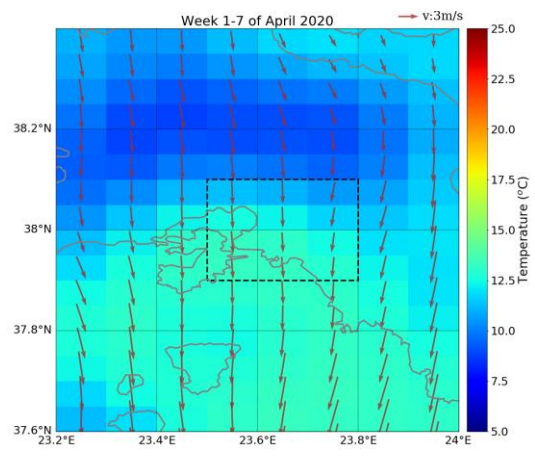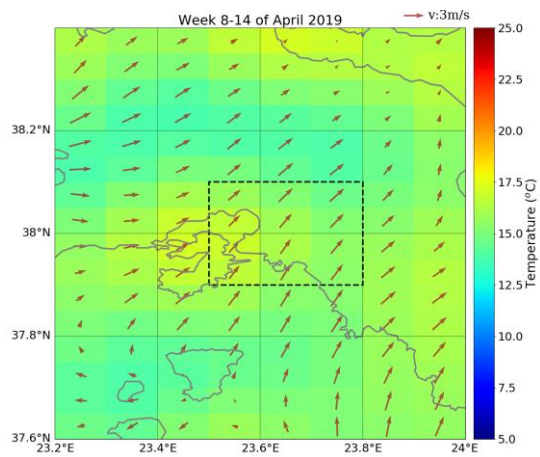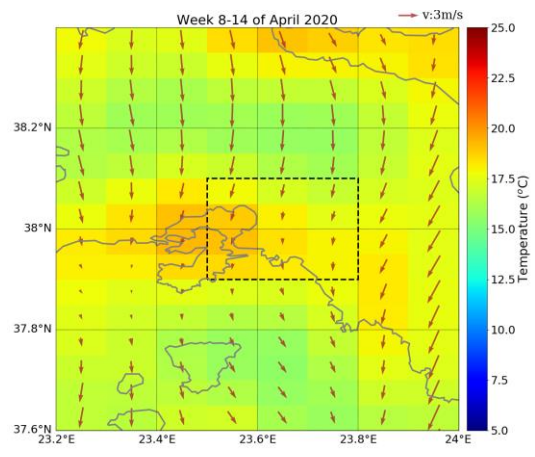

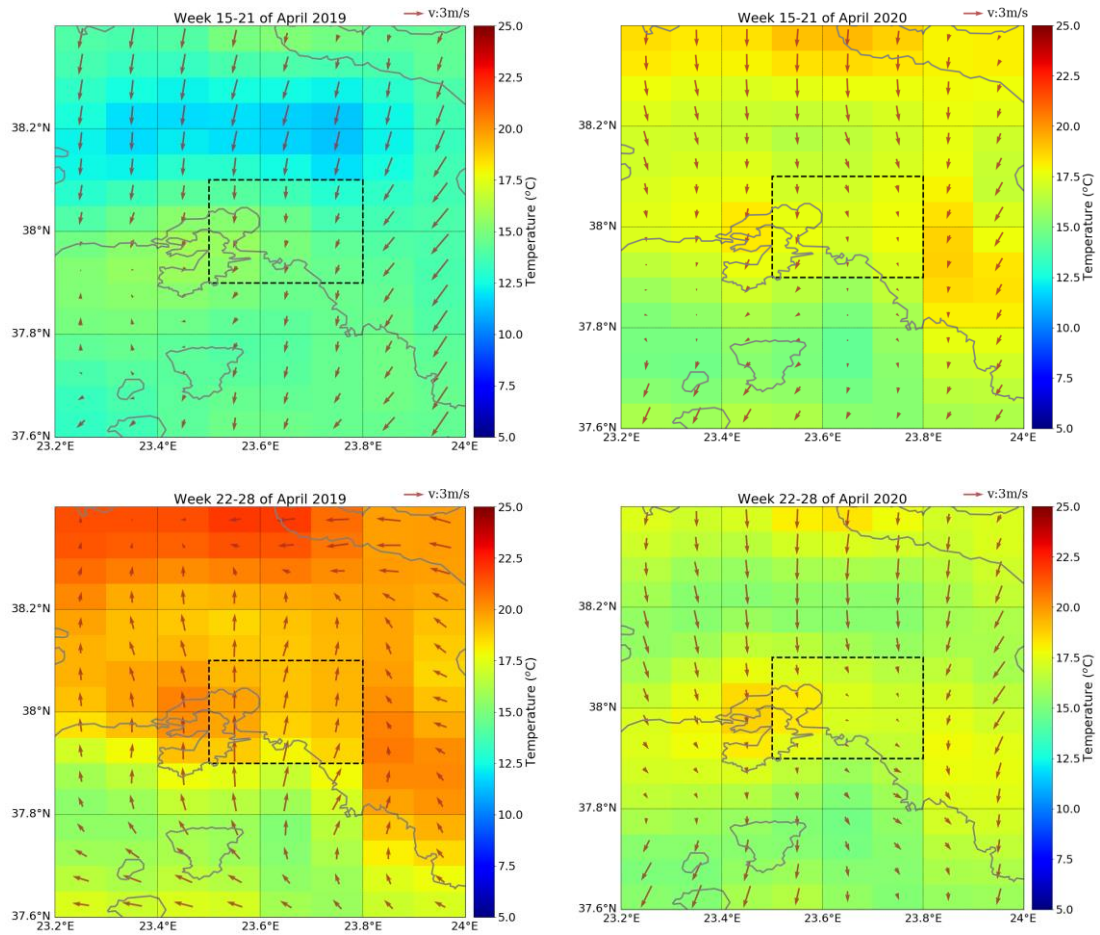

Figure S5. Mean temperature in Celsius [in colours], mean vector wind speed and mean vector direction [arrows] for the eight weeks of March and April 2019 [left column] and 2020 [right column] at 12 UTC. Black box denotes the grids designated as Athens in this work.



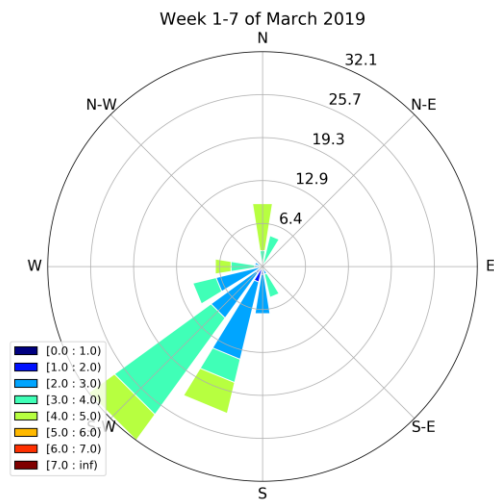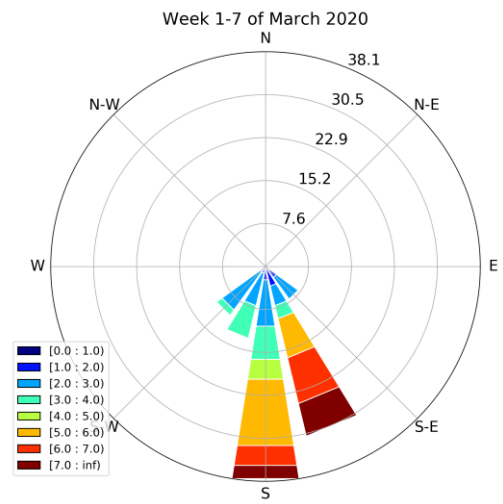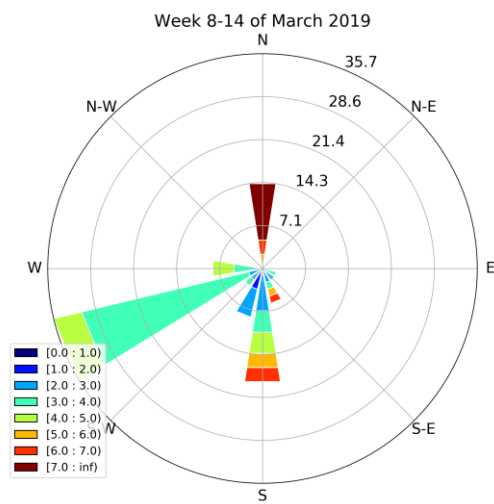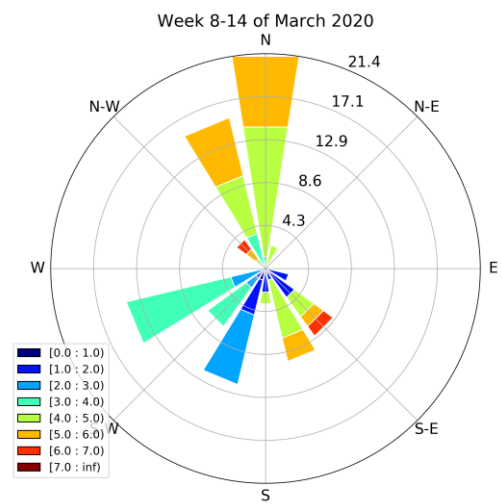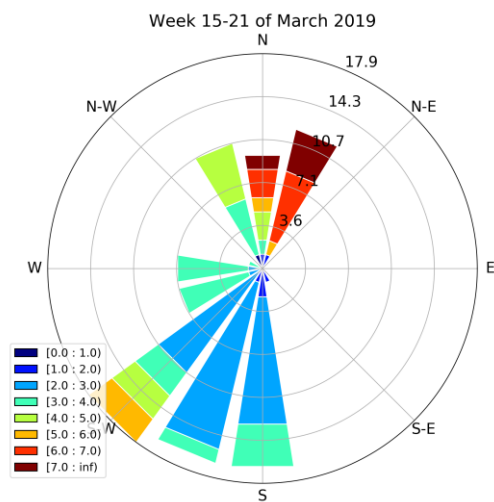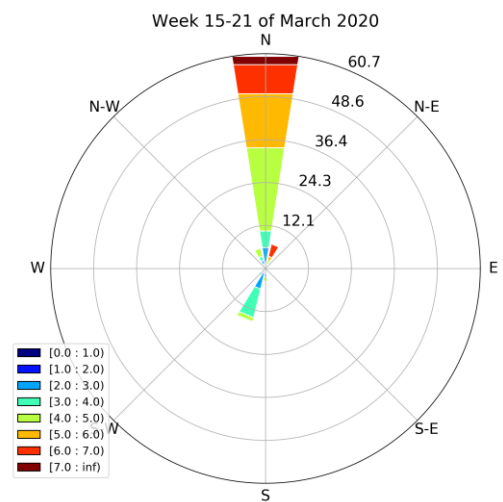

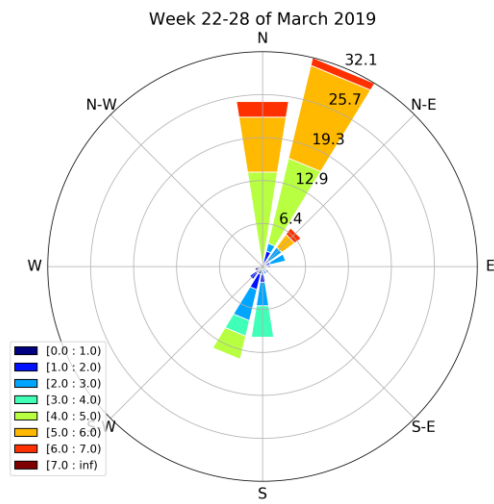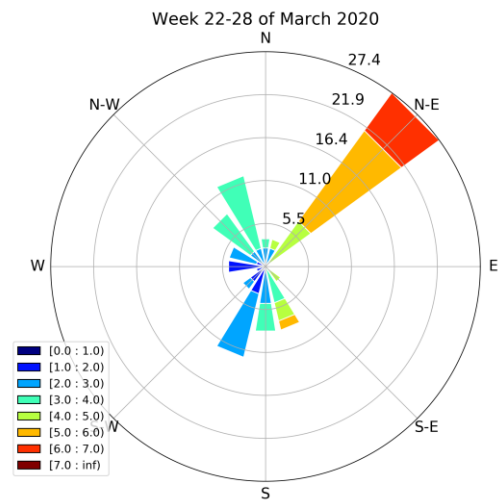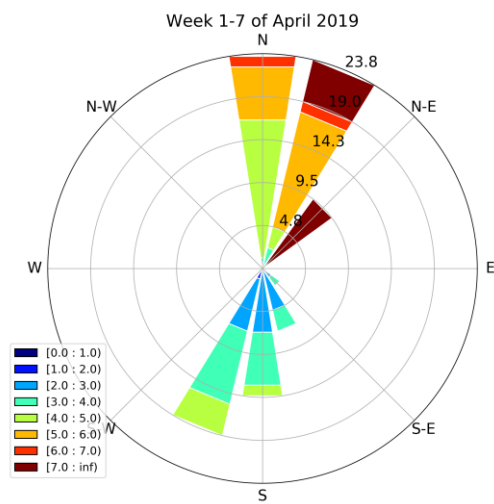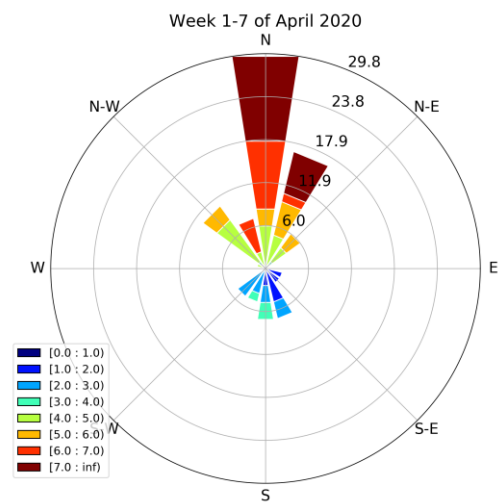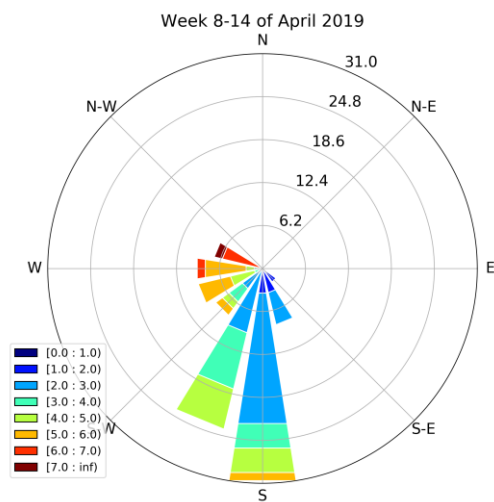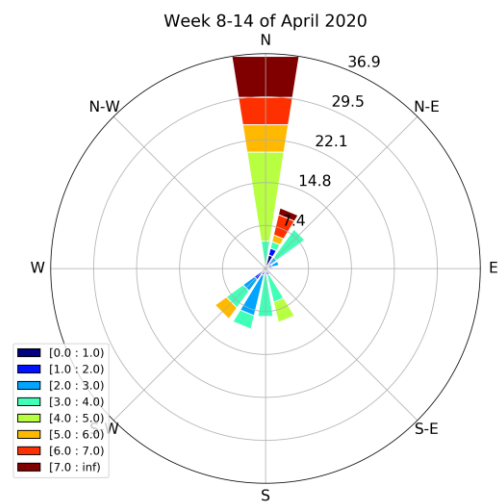

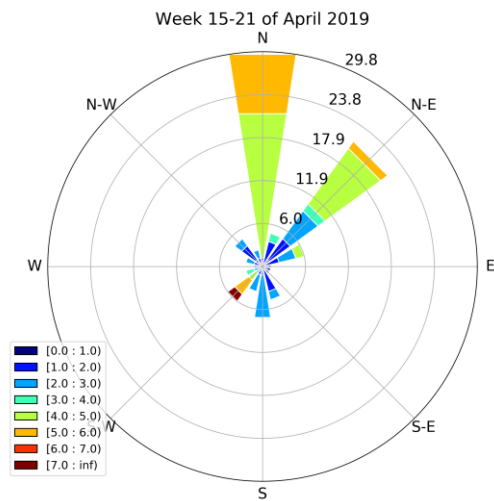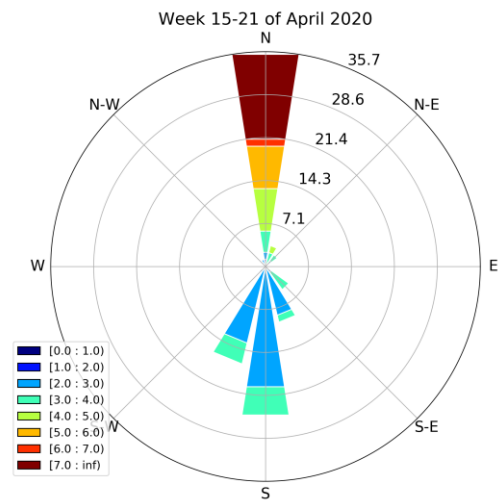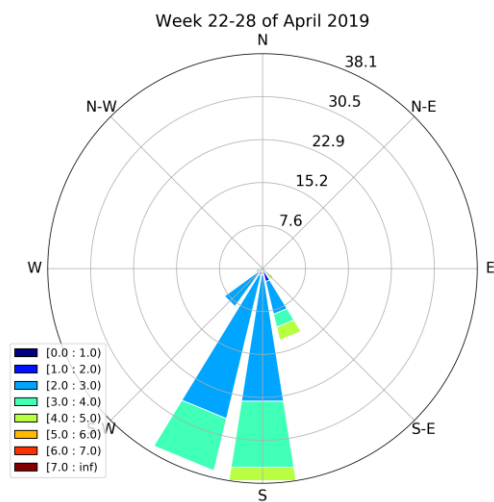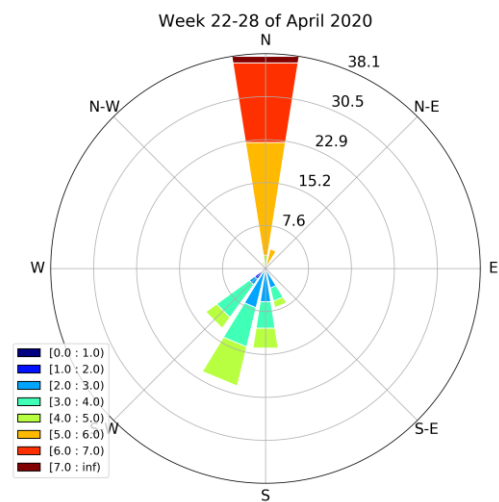

28 Figure S6. Rose diagram of the daily wind speed and direction for the 12 grids designated as Athens  
 29 shown in Figure S5. From top to bottom the eight weeks in March and April for 2019 [left column]  
 30 and 2020 [right column.]

31  
 32
